# Supplementary material for: A bioinformatics pipeline to search functional motifs within whole-proteome data: a case study of poxviruses
Source: PubMed Central journal article supplement (PMC5357487; doi:10.1007/s11262-016-1416-9), 2016-12-20
Supplement: 11262_2016_1416_MOESM1_ESM.pdf [file 11262_2016_1416_MOESM1_ESM.pdf]

# Shetti-Motif

**Haitham Sobhy**

**Supplementary file – SI-1:** This file, contains table S1 and figures S1-S9.

**Supplementary file – SI-2:** A compressed file (zip format) contains NCBI-BLASTp output files. The x-rich motifs differ from LCRs and may not be masked. For example, BLASTp was used to mask LCRs in four proteins encoded by *Acanthamoeba polyphaga* mimivirus (UniProt ID: 5757), as the following:

1. Collagen-like protein (L669: Q5UNS9), 1937 aa, is S-rich protein (450 Ser, ~23% of length), the LCR regions are masked by BLASTp.
2. Hypothetical protein (R661: E3VZK9), 218 aa, is enriched with Cys (~11% of length), but the region masked does not contain Cys residue.
3. Hypothetical protein (L725: Q5UNX5), 224 aa, is enriched with Cys and Lys (~17% of the length; 21 K and 18 C), which are not masked.
4. Putative TPR repeat-containing protein (R856: Q5UQQ7), 342 aa, KLN share ~27% of R856 length, (32, 30 and 30 Asn, Lys and Leu, respectively, but only 5 Cys and 1 Pro), but not masked.

**Supplementary Table S2 (in a separate excel spreadsheet).**

The tool is supplemented with built-in patterns/motifs obtained from experimentally validated literature. The table consists of the motif, description/function and references to PubMed IDs. See also, Fig. S3.

**Supplementary Table S3 (in a separate excel spreadsheet).**

The motif-containing proteins were counted and normalized (percentage %) to the total number of the proteins encoded by a virus. These normalized values were then used for further statistical analysis, see Fig. 2 in the manuscript.

## Supplementary file – S1

**Table S1.** Shetti-Motif accepts PROSITE pattern syntax. Some reports use Latin symbols to refer to degenerate residues, e.g.  $\theta$ ,  $\Psi$ ,  $\Phi$ , etc., which refers to residues share a similar physicochemical property(ies), such as hydrophobicity, polarity, etc. For simplicity, Shetti-Motif accepts non-Latin symbols as listed in the table. These symbols are explicitly translated to the corresponding residues. Otherwise, users may insert alternative / degenerate residues between “[” and “]”.

Noteworthy, the physical properties of bases might be not the same within literatures. As an example, some reports refer to (F, I, L or V) residues as hydrophobic one. In Shetti-Motif, A, C, F, G, V, L, I, P, W, M or Y are considered as hydrophobic residues. This may lead to reporting additional motifs (e.g. contain A or Y, instead of those contain only F, I, L or V). To overcome this issue, users may write directly “[FILV]”, instead of the representative symbol.

**Table S1.**

| Residues                                    | Representative Motif            | Symbol     | Physical properties     |
|---------------------------------------------|---------------------------------|------------|-------------------------|
| Arg-Gly-Asp                                 | RGD                             |            |                         |
| Pro-Pro-any amino acid-Tyr                  | PPxY                            |            |                         |
| P, and (E or D) residues $\approx$ PE or PD | P[ED]                           |            |                         |
| P, and any residue but R                    | P{R}                            |            |                         |
| T is repeated 2, 2-5 or >3 times            | PAST(2), PAST(2-5), or PAST(3,) |            |                         |
| E or D                                      | [ED]                            | - “hyphen” | Negative - Acidic       |
| H, K or R                                   | [HKR]                           | +          | Positive - Basic        |
| S or T                                      | [ST]                            | =          | Alcohol                 |
| C or M                                      | [CM]                            | *          | Sulfur containing       |
| I, V or L                                   | [IVL]                           | ?          | Aliphatic               |
| A, G or S                                   | [AGS]                           | &          | Tiny                    |
| F, H, W or Y                                | [FHWY]                          | @          | Aromatic                |
| D, E, H, K, N, Q, R, S or T                 | [DEHKNQRST]                     | %          | Polar / hydrophilic     |
| A, C, F, G, V, L, I, P, W, M or Y           | [ACFGVLIPWMY]                   | !          | Non-polar / hydrophobic |
| C, W, N, Q, S, T, Y, K, R, H, D or E        | [CWNQSTYKRHDE]                  | #          | H-bond                  |
| Any amino acid                              | Any amino acid                  | x          | Any amino acid          |

**Fig. S1.** Result of sequences enriched with residues (x-rich motifs) appears in “Result - statistics” tab, which include the names of the proteins, protein length, number of motifs in each protein, and coverage of the residues to the full length of the protein (%). The results are tabulated and can be transferred to text editor or Excel software.

| Protein name                 | Length | Number of motifs | Coverage to protein length                                                | Statistics                           |
|------------------------------|--------|------------------|---------------------------------------------------------------------------|--------------------------------------|
| AY386371.1_prot_AA07364.1.1  | 11     | 1                | [protein=11] [protein_id=AA07364.1] [location=complement(804..1808)]      | 334 2 C = 3.29; P = 1.5; V = 12.57;  |
| AY386371.1_prot_AA07365.1.2  | 21     | 1                | [protein=21] [protein_id=AA07365.1] [location=complement(1938..2963)]     | 341 1 C = 2.64; P = 4.4; V = 7.04;   |
| AY386371.1_prot_AA07367.1.4  | 51     | 2                | [protein=51] [protein_id=AA07367.1] [location=complement(3762..4232)]     | 156 2 C = 7.05; P = 0; V = 9.62;     |
| AY386371.1_prot_AA07368.1.5  | 61     | 1                | [protein=61] [protein_id=AA07368.1] [location=complement(4274..4732)]     | 152 1 C = 3.95; P = 2.63; V = 8.55;  |
| AY386371.1_prot_AA07372.1.9  | 131    | 1                | [protein=131] [protein_id=AA07372.1] [location=complement(8614..9474)]    | 286 1 C = 2.8; P = 3.15; V = 7.34;   |
| AY386371.1_prot_AA07376.1.13 | 191    | 1                | [protein=191] [protein_id=AA07376.1] [location=complement(11200..12774)]  | 524 1 C = 2.48; P = 2.67; V = 10.5;  |
| AY386371.1_prot_AA07381.1.18 | 241    | 1                | [protein=241] [protein_id=AA07381.1] [location=complement(14799..15443)]  | 214 1 C = 3.27; P = 3.27; V = 5.61;  |
| AY386371.1_prot_AA07383.1.20 | 261    | 1                | [protein=261] [protein_id=AA07383.1] [location=complement(16786..18711)]  | 641 1 C = 2.03; P = 3.12; V = 5.77;  |
| AY386371.1_prot_AA07384.1.21 | 271    | 1                | [protein=271] [protein_id=AA07384.1] [location=complement(18736..19845)]  | 369 1 C = 2.44; P = 2.98; V = 6.23;  |
| AY386371.1_prot_AA07388.1.25 | 311    | 2                | [protein=311] [protein_id=AA07388.1] [location=21335..21649]              | 104 2 C = 4.81; P = 6.73; V = 7.69;  |
| AY386371.1_prot_AA07390.1.27 | 331    | 3                | [protein=331] [protein_id=AA07390.1] [location=complement(23072..25120)]  | 682 3 C = 2.64; P = 2.79; V = 6.6;   |
| AY386371.1_prot_AA07391.1.28 | 341    | 1                | [protein=341] [protein_id=AA07391.1] [location=complement(25146..25700)]  | 184 1 C = 3.26; P = 4.89; V = 5.98;  |
| AY386371.1_prot_AA07393.1.30 | 361    | 1                | [protein=361] [protein_id=AA07393.1] [location=26444..27472]              | 342 1 C = 4.09; P = 2.63; V = 6.14;  |
| AY386371.1_prot_AA07396.1.33 | 391    | 6                | [protein=391] [protein_id=AA07396.1] [location=complement(30022..33042)]  | 1006 6 C = 2.49; P = 3.08; V = 6.76; |
| AY386371.1_prot_AA07397.1.34 | 401    | 1                | [protein=401] [protein_id=AA07397.1] [location=33075..33559]              | 94 1 C = 3.19; P = 4.26; V = 4.26;   |
| AY386371.1_prot_AA07403.1.40 | 471    | 1                | [protein=471] [protein_id=AA07403.1] [location=complement(36245..37402)]  | 385 1 C = 2.08; P = 3.64; V = 8.57;  |
| AY386371.1_prot_AA07408.1.45 | 521    | 1                | [protein=521] [protein_id=AA07408.1] [location=42822..43490]              | 222 1 C = 3.6; P = 1.35; V = 5.41;   |
| AY386371.1_prot_AA07423.1.60 | 671    | 1                | [protein=671] [protein_id=AA07423.1] [location=52968..53471]              | 167 1 C = 2.4; P = 3.59; V = 10.18;  |
| AY386371.1_prot_AA07424.1.61 | 681    | 1                | [protein=681] [protein_id=AA07424.1] [location=53549..54550]              | 333 1 C = 0.9; P = 4.8; V = 4.8;     |
| AY386371.1_prot_AA07426.1.63 | 701    | 1                | [protein=701] [protein_id=AA07426.1] [location=complement(54999..55412)]  | 137 1 C = 5.84; P = 4.38; V = 7.3;   |
| AY386371.1_prot_AA07427.1.64 | 711    | 1                | [protein=711] [protein_id=AA07427.1] [location=55509..59366]              | 1285 1 C = 1.25; P = 3.5; V = 6.07;  |
| AY386371.1_prot_AA07428.1.65 | 721    | 2                | [protein=721] [protein_id=AA07428.1] [location=complement(59363..59872)]  | 169 2 C = 1.78; P = 3.55; V = 8.88;  |
| AY386371.1_prot_AA07431.1.68 | 751    | 2                | [protein=751] [protein_id=AA07431.1] [location=complement(61421..63814)]  | 797 2 C = 1; P = 2.76; V = 6.4;      |
| AY386371.1_prot_AA07435.1.72 | 791    | 3                | [protein=791] [protein_id=AA07435.1] [location=65982..68504]              | 840 3 C = 0.95; P = 2.98; V = 7.02;  |
| AY386371.1_prot_AA07438.1.75 | 821    | 1                | [protein=821] [protein_id=AA07438.1] [location=69660..70319]              | 219 1 C = 2.74; P = 5.94; V = 7.31;  |
| AY386371.1_prot_AA07439.1.76 | 831    | 1                | [protein=831] [protein_id=AA07439.1] [location=70393..72753]              | 786 1 C = 2.8; P = 4.2; V = 6.11;    |
| AY386371.1_prot_AA07440.1.77 | 841    | 1                | [protein=841] [protein_id=AA07440.1] [location=72750..74657]              | 635 1 C = 0.31; P = 3.15; V = 5.98;  |
| AY386371.1_prot_AA07441.1.78 | 851    | 1                | [protein=851] [protein_id=AA07441.1] [location=74690..75172]              | 160 1 C = 3.12; P = 2.5; V = 8.75;   |
| AY386371.1_prot_AA07442.1.79 | 861    | 2                | [protein=861] [protein_id=AA07442.1] [location=75194..75859]              | 221 2 C = 2.71; P = 1.81; V = 5.88;  |
| AY386371.1_prot_AA07444.1.81 | 881    | 1                | [protein=881] [protein_id=AA07444.1] [location=complement(76586..78481)]  | 631 1 C = 1.58; P = 2.69; V = 6.66;  |
| AY386371.1_prot_AA07446.1.83 | 901    | 5                | [protein=901] [protein_id=AA07446.1] [location=complement(79398..81059)]  | 553 5 C = 1.81; P = 4.16; V = 9.95;  |
| AY386371.1_prot_AA07447.1.84 | 911    | 1                | [protein=911] [protein_id=AA07447.1] [location=complement(81076..81531)]  | 151 1 C = 3.31; P = 3.97; V = 9.93;  |
| AY386371.1_prot_AA07450.1.87 | 941    | 1                | [protein=941] [protein_id=AA07450.1] [location=complement(82467..84440)]  | 657 1 C = 1.98; P = 3.96; V = 5.18;  |
| AY386371.1_prot_AA07454.1.91 | 981    | 1                | [protein=981] [protein_id=AA07454.1] [location=complement(86619..88760)]  | 713 1 C = 1.4; P = 2.52; V = 6.59;   |
| AY386371.1_prot_AA07457.1.94 | 1011   | 1                | [protein=1011] [protein_id=AA07457.1] [location=complement(89933..92641)] | 902 1 C = 1.33; P = 3.44; V = 4.99;  |
| AY386371.1_prot_AA07458.1.95 | 1021   | 1                | [protein=1021] [protein_id=AA07458.1] [location=92656..93600]             | 314 1 C = 1.27; P = 3.5; V = 5.73;   |

**Fig. S2.** For sequences enriched with residues (x-rich motifs), the protein sequence headers, the sequences of the motifs and statistics are presented in tab “Result - sequences”. The results can be transferred to text editor software.

```

ShettiMotif
File Load patterns Help
Options Result - table Result - statistics Result - sequences
>|Id|AY386371.1_prot_AAR07364.1_1 [protein=1L] [protein_id=AAR07364.1] [location=complement(804..1808)]
;Motif_1 Motif length: 15; Residue coverage: 40% Residue(s) count: C = 1; P = 1; V = 4;
;CEVVAVGKMKRTPV
;Motif_2 Motif length: 15; Residue coverage: 40% Residue(s) count: C = 2; P = 0; V = 4;
;DVCVGDHLTVVKCFK
>|Id|AY386371.1_prot_AAR07365.1_2 [protein=2L] [protein_id=AAR07365.1] [location=complement(1938..2963)]
;Motif_1 Motif length: 15; Residue coverage: 33% Residue(s) count: C = 0; P = 2; V = 3;
;IPSNVMPVTVTGEE
>|Id|AY386371.1_prot_AAR07367.1_4 [protein=5L] [protein_id=AAR07367.1] [location=complement(3762..4232)]
;Motif_1 Motif length: 25; Residue coverage: 32% Residue(s) count: C = 2; P = 0; V = 6;
;DDTFDFVFLTVYSMLVTVCLCV
;Motif_2 Motif length: 15; Residue coverage: 40% Residue(s) count: C = 2; P = 0; V = 4;
;MLVTVCVFLAL
>|Id|AY386371.1_prot_AAR07368.1_5 [protein=6L] [protein_id=AAR07368.1] [location=complement(4274..4732)]
;Motif_1 Motif length: 15; Residue coverage: 33% Residue(s) count: C = 3; P = 1; V = 1;
;MDFCPGCLVDCLNR
>|Id|AY386371.1_prot_AAR07372.1_9 [protein=13L] [protein_id=AAR07372.1] [location=complement(8614..9474)]
;Motif_1 Motif length: 15; Residue coverage: 33% Residue(s) count: C = 0; P = 2; V = 3;
;KRYVPMVPMFVLGHS
>|Id|AY386371.1_prot_AAR07376.1_13 [protein=19L] [protein_id=AAR07376.1] [location=complement(11200..12774)]
;Motif_1 Motif length: 15; Residue coverage: 33% Residue(s) count: C = 0; P = 3; V = 2;
;PDMYPRKFGVNF
>|Id|AY386371.1_prot_AAR07381.1_18 [protein=24L] [protein_id=AAR07381.1] [location=complement(14799..15443)]
;Motif_1 Motif length: 15; Residue coverage: 33% Residue(s) count: C = 1; P = 0; V = 4;
;IICFVDFVIVV
>|Id|AY386371.1_prot_AAR07383.1_20 [protein=26L] [protein_id=AAR07383.1] [location=complement(16786..18711)]
;Motif_1 Motif length: 15; Residue coverage: 33% Residue(s) count: C = 0; P = 3; V = 2;
;VGITKYVEPSLPDK
>|Id|AY386371.1_prot_AAR07384.1_21 [protein=27L] [protein_id=AAR07384.1] [location=complement(18736..19845)]
;Motif_1 Motif length: 15; Residue coverage: 33% Residue(s) count: C = 2; P = 2; V = 1;
;ACCLPVSTKYHYNF
>|Id|AY386371.1_prot_AAR07388.1_25 [protein=31R] [protein_id=AAR07388.1] [location=21335..21649]
;Motif_1 Motif length: 15; Residue coverage: 33% Residue(s) count: C = 2; P = 0; V = 3;
;KVCDIRKVDVCDVSKA
;Motif_2 Motif length: 15; Residue coverage: 40% Residue(s) count: C = 2; P = 2; V = 2;
;SCLVKVEKPTPTCDR
>|Id|AY386371.1_prot_AAR07390.1_27 [protein=33L] [protein_id=AAR07390.1] [location=complement(23072..25120)]
;Motif_1 Motif length: 15; Residue coverage: 33% Residue(s) count: C = 2; P = 0; V = 3;
;KEVFTTEICVRVCD
  
```

**Fig. S3.** The built-in patterns are listed with check-boxes. The user may choose the pattern(s) of interest, then click on “Select these patterns” button. The pattern(s) are populated in the search text area. In “Options” tab, select or deselect all by ticking on “Select All”. The patterns were acquired from PROSITE databases (<http://prosite.expasy.org/>, <ftp://ftp.expasy.org/databases/prosite/>, last accessed August, 2015), or from literatures, see table S2 for references and PubMed IDs.

Select ALL
 

- 6-cysteine motif, degradation of chitin and chitotriose ::: Cx(13,20)Cx(5,6)Cx(9,19)Cx(10,14)Cx(4,14)C
- Adenovirus-2/5 nuclear localization signal (NLS) ::: KRAR
- Adenovirus-C - putative heparan sulfate-binding site/motif, important for post-internalization steps of virus infection ::: KKTK
- Adenovirus-D fiber flexibility motif ::: KLGXGLxF[DN]
- Adenovirus-D fiber flexibility motif ::: KxGGLxF[DN]
- Adhesion protein motif ::: KxGFFKR
- Adhesion protein motif ::: SVSVGMKPSRPR
- Binding of Vif to human APOBEC3G, ElonginB and C, and cullin 5, suppression of APOBEC3 proteins ::: PPLP
- Binding of Vif to human APOBEC3G, ElonginB and C, and cullin5, suppression of APOBEC3 proteins ::: SLxYLA
- Binding to ESCRT, Paramyxoviruses budding ::: IPxV
- binding to integrins (Adenovirus and foot-and-mouth disease virus) ::: RGD
- Binding to integrins, and viral attachment to cellular receptors ::: DLxxL
- Binding to Rb (LxCxE motif) ::: [L]x[Cx][DE]
- Budded virions production and nucleocapsid assembly ::: Cx5CxnHx6C (C2HC zinc finger)
- Caveolin scaffolding domain (CSD) ::: !x!xxxx!
- Caveolin scaffolding domain (CSD) ::: !x!xxxx!xx!
- Caveolin scaffolding domain (CSD) ::: !xxxx!xx!
- Cell surface of Plasmodium falciparum, Thrombospondin type-1 (TSP1) repeat profile, adhesive, Immunodominant surface antigen on the sporozoite (the infe
- Clathrin-binding motifs, clathrin-box ::: L!x! [DE]
- Clathrin-binding motifs, clathrin-box ::: L[L] [DEN] [LF] [DE]
- Clathrin-binding motifs, W-box ::: PW!xxW
- cleavage of NS1 from the NS1-NS2A region of flavivirus ::: [LM]VxSxVxVx
- cleavage site for Influenza A ::: [QE] [ST] RGLF
- cleavage site of HA of H9N2 avian influenza KSS[RG]LF motif ::: KSS[RG]LF
- cleavage site of HA of H9N2 avian influenza vaccine strain ::: RSS[RG]LF
- could allow SUMO to bind to substrate ::: [VI]x[VI][VI]
- dynein binding motifs, protein transport, viruses transport inside the cell (Adenovirus, ASF virus, Papilloma virus, Rabies virus, Mokola Virus and Ebolavirus) :
- dynein binding motifs, protein transport, viruses transport inside the cell (Adenovirus, ASF virus, Papilloma virus, Rabies virus, Mokola Virus and Ebolavirus) :
- enhance virion-release, anti-tetherin activity ::: DSGxxS
- EPIYA-related motif, interactions between bacterial effectors and host SH2 domain-containing proteins ::: [ENT] [HNPS] [ILV] Y [ADEG]
- EPIYA-related motif, interactions between bacterial effectors and host SH2 domain-containing proteins ::: EDLY
- EPIYA-related motif, interactions between bacterial effectors and host SH2 domain-containing proteins ::: EHIYD
- EPIYA-related motif, interactions between bacterial effectors and host SH2 domain-containing proteins ::: EHLYA
- EPIYA-related motif, interactions between bacterial effectors and host SH2 domain-containing proteins ::: ENIYE
- EPIYA-related motif, interactions between bacterial effectors and host SH2 domain-containing proteins ::: EPIYA
- EPIYA-related motif, interactions between bacterial effectors and host SH2 domain-containing proteins ::: EPIYG
- EPIYA-related motif, interactions between bacterial effectors and host SH2 domain-containing proteins ::: EPIYD
- EPIYA-related motif, interactions between bacterial effectors and host SH2 domain-containing proteins ::: EPIYD
- EPIYA-related motif, interactions between bacterial effectors and host SH2 domain-containing proteins ::: EPLYA
- EPIYA-related motif, interactions between bacterial effectors and host SH2 domain-containing proteins ::: EPLYA
- EPIYA-related motif, interactions between bacterial effectors and host SH2 domain-containing proteins ::: EPVYA
- EPIYA-related motif, interactions between bacterial effectors and host SH2 domain-containing proteins ::: ESIYE
- EPIYA-related motif, interactions between bacterial effectors and host SH2 domain-containing proteins ::: NPLYE
- EPIYA-related motif, interactions between bacterial effectors and host SH2 domain-containing proteins ::: TPLYA
- FIL-rich domain, agnoprotein function, productive viral infection ::: L[F] [VI] F [VIL] [LE] [LF] LLxF

**Fig. S4.** After clicking “Search pattern” button, the protein containing the motifs, and the motifs and their positions on the sequences are listed in a table, in “Result - table” tab. The results are tabulated and can be moved to text editor or Excel software.

**Note:** for multiple pattern, the results are printed to text file.

|    | Sequence header                                                                                                                         | Motifs (Position: Motif) | Number of motifs in the protein |
|----|-----------------------------------------------------------------------------------------------------------------------------------------|--------------------------|---------------------------------|
| 1  | kl AY386371.1_prot_AAR07375.1_12 [protein=17L] [protein_id=AAR07375.1] [location=complement(10635..11066)]                              | '105: RGD'; '133: RGD';  | 2                               |
| 2  | kl AY386371.1_prot_AAR07418.1_55 [protein=62L] [protein_id=AAR07418.1] [location=complement(49816..50763)]                              | '257: RGD';              | 1                               |
| 3  | kl AY386371.1_prot_AAR07429.1_66 [protein=73R] [protein_id=AAR07429.1] [location=59887..60456]                                          | '126: RGD';              | 1                               |
| 4  | kl AY386371.1_prot_AAR07439.1_76 [protein=83R] [protein_id=AAR07439.1] [location=70393..72753]                                          | '344: RGD';              | 1                               |
| 5  | kl AY386371.1_prot_AAR07494.1_131 [protein=142R] [protein_id=AAR07494.1] [location=123296..124225]                                      | '223: RGD';              | 1                               |
| 6  | kl X69198.1_prot_CAA48949.1_8 [gene=D8L] [protein=D8L] [protein_id=CAA48949.1] [location=complement(8602..9054)]                        | '24: RGD';               | 1                               |
| 7  | kl X69198.1_prot_CAA48967.1_26 [gene=C6L] [protein=C6L] [protein_id=CAA48967.1] [location=complement(21874..22317)]                     | '136: RGD';              | 1                               |
| 8  | kl X69198.1_prot_CAA48980.1_39 [gene=C19L] [protein=C19L] [protein_id=CAA48980.1] [location=complement(33321..33806)]                   | '123: RGD';              | 1                               |
| 9  | kl X69198.1_prot_CAA49028.1_87 [gene=I4L] [protein=I4L] [protein_id=CAA49028.1] [location=complement(80101..82488)]                     | '137: RGD';              | 1                               |
| 10 | kl X69198.1_prot_CAA49036.1_95 [gene=F5R] [protein=F5R] [protein_id=CAA49036.1] [location=89132..91489]                                 | '344: RGD';              | 1                               |
| 11 | kl X69198.1_prot_CAA49110.1_169 [gene=B1R] [protein=B1R] [protein_id=CAA49110.1] [location=152700..153602]                              | '211: RGD';              | 1                               |
| 12 | kl AY243312.1_prot_AAO89320.1_41 [gene=VACWR041] [protein=dUTPase] [protein_id=AAO89320.1] [location=complement(31038..31481)]          | '136: RGD';              | 1                               |
| 13 | kl AY243312.1_prot_AAO89333.1_54 [gene=VACWR054] [protein=unknown] [protein_id=AAO89333.1] [location=complement(42460..42903)]          | '109: RGD';              | 1                               |
| 14 | kl AY243312.1_prot_AAO89369.1_90 [gene=VACWR090] [protein=unknown] [protein_id=AAO89369.1] [location=complement(78062..79114)]          | '19: RGD';               | 1                               |
| 15 | kl AY243312.1_prot_AAO89381.1_102 [gene=VACWR102] [protein=RAP94] [protein_id=AAO89381.1] [location=complement(89298..91685)]           | '137: RGD';              | 1                               |
| 16 | kl AY243312.1_prot_AAO89389.1_110 [gene=VACWR110] [protein=NTPase interacts with A20R] [protein_id=AAO89389.1]                          | '344: RGD';              | 1                               |
| 17 | kl AY243312.1_prot_AAO89462.1_183 [gene=VACWR183] [protein=ser/thr kinase] [protein_id=AAO89462.1] [location=163878..164780]            | '211: RGD';              | 1                               |
| 18 | kl AY243312.1_prot_AAO89469.1_190 [gene=VACWR190] [protein=soluble interferon-gamma receptor-like protein] [protein_id=AAO89469.1]      | '137: RGD';              | 1                               |
| 19 | kl AY243312.1_prot_AAO89473.1_194 [gene=VACWR194] [protein=ser/thr protein kinase-like protein] [protein_id=AAO89473.1] [location=17... | '199: RGD';              | 1                               |
| 20 | kl AY243312.1_prot_AAO89485.1_206 [gene=VACWR206] [protein=unknown] [protein_id=AAO89485.1] [location=183734..184306]                   | '149: RGD';              | 1                               |
| 21 | kl AY386264.1_prot_AAR98232.1_4 [protein=ORF007 dUTPase] [protein_id=AAR98232.1] [location=complement(5191..5700)]                      | '145: RGD';              | 1                               |

**Fig. S5.** The percentage (in %) of the protein harbouring these motifs to the entire protein dataset (proteome) appears in a text area, in “Result - statistics” tab. The results are tabulated and can be moved to text editor or Excel software.

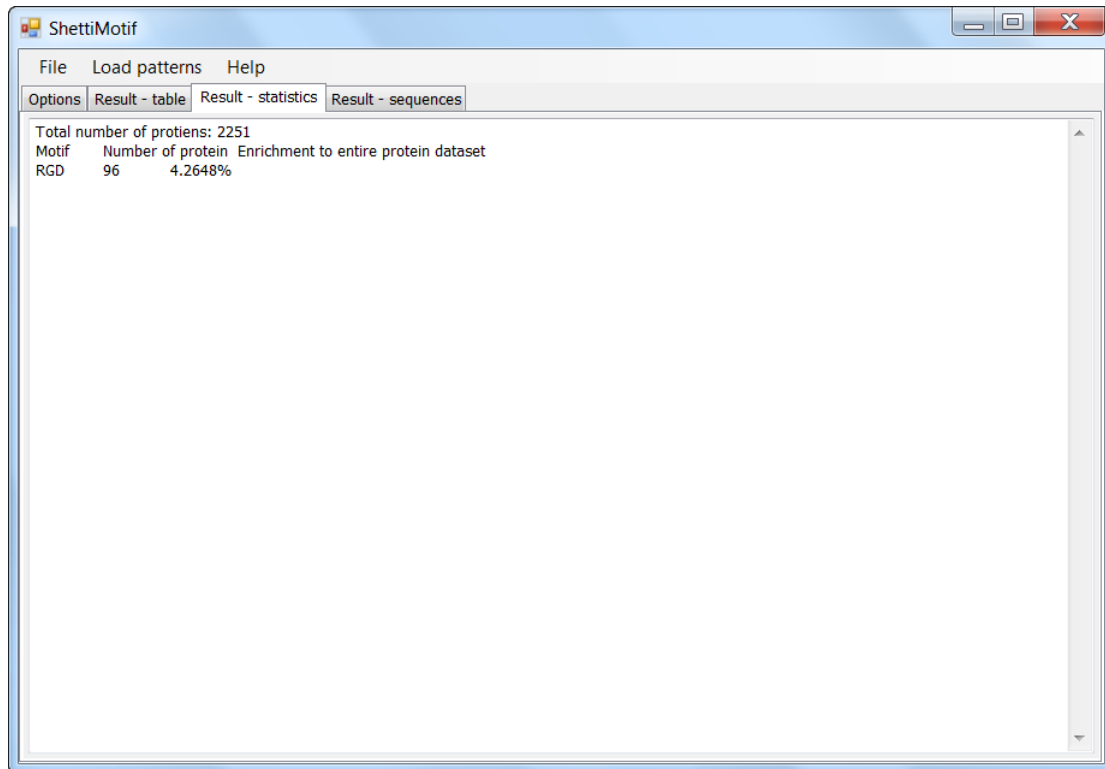

**Fig. S6.** The sequences of the motif-containing proteins appear in a text area, in “Result - sequences” tab, which can be copied to text editor software.

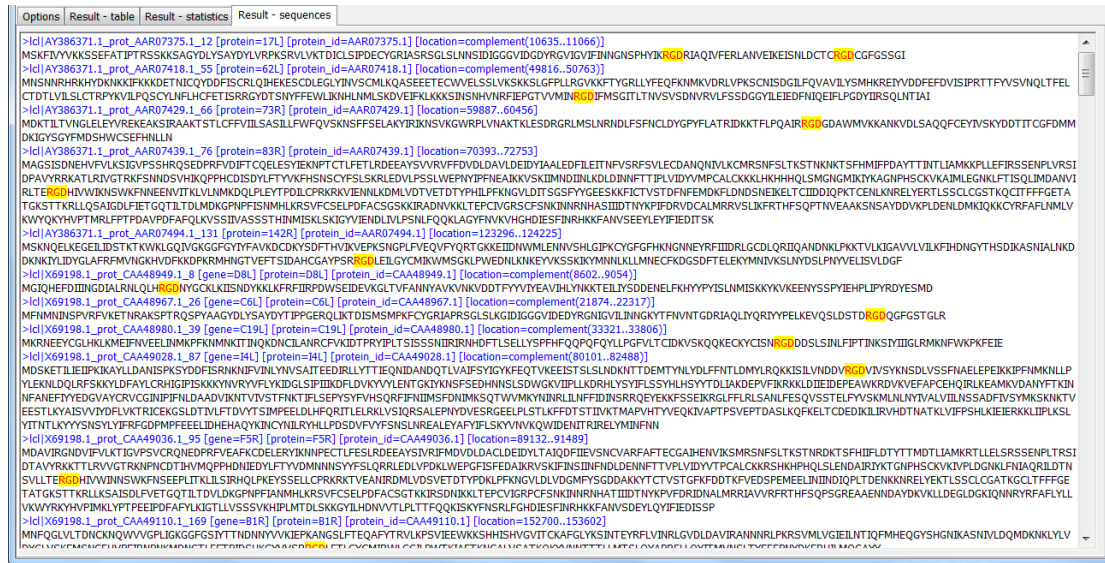



**Fig. S7.** The PROSITE flat file can be converted to a table format. In “Result - table” tab, the results are tabulated and can be moved to text editor or Excel software.

|    | Identification               | Accession number | Description                                                  | Pattern                                                                      |
|----|------------------------------|------------------|--------------------------------------------------------------|------------------------------------------------------------------------------|
| 1  | ASN_GLYCOSYLATION; PATTERN   | PS00001          | N-glycosylation site                                         | N-(P)-[ST]-[P]                                                               |
| 2  | CAMP_PHOSPHO_SITE; PATTERN   | PS00004          | cAMP- and cGMP-dependent protein kinase phosphorylation site | [RK](2)-x-[ST]                                                               |
| 3  | PKC_PHOSPHO_SITE; PATTERN    | PS00005          | Protein kinase C phosphorylation site                        | [ST]-x-[RK]                                                                  |
| 4  | CK2_PHOSPHO_SITE; PATTERN    | PS00006          | Casein kinase II phosphorylation site                        | [ST]-x(2)-[DE]                                                               |
| 5  | TYR_PHOSPHO_SITE; PATTERN    | PS00007          | Tyrosine kinase phosphorylation site                         | [RK]-x(2,3)-[DE]-x(2,3)-Y                                                    |
| 6  | MYRISTYL; PATTERN            | PS00008          | N-myristoylation site                                        | G-(EDRKHPFFW)-x(2)-[STAGCN]-[P]                                              |
| 7  | AMIDATION; PATTERN           | PS00009          | Amidation site                                               | x-G-[RK]-[RK]                                                                |
| 8  | ASX_HYDROXYL; PATTERN        | PS00010          | Aspartic acid and asparagine hydroxylation site              | C-x-[DN]-x(4)-[FY]-x-C-x-C                                                   |
| 9  | GLA_1; PATTERN               | PS00011          | Vitamin K-dependent carboxylation domain                     | E-x(2)-[ERK]-E-x-C-x(6)-[EDR]-x(10,11)-[FYA]-[YW]                            |
| 10 | PHOSPHOPANTHETHEINE; PATTERN | PS00012          | Phosphopantetheine attachment site                           | [DEQGSTALMKRH]-[LIVFYSTAC]-[GNQ]-[LIVFYAG]-[DNEKHS]-S-[LIVMST]-[PCF]         |
| 11 | ER_TARGET; PATTERN           | PS00014          | Endoplasmic reticulum targeting sequence                     | [KRHQSA]-[DENQ]-E-L>                                                         |
| 12 | RGD; PATTERN                 | PS00016          | Cell attachment sequence                                     | R-G-D                                                                        |
| 13 | ATP_GTP_A; PATTERN           | PS00017          | ATP/GTP-binding site motif A (P-loop)                        | [AG]-x(4)-G-K-[ST]                                                           |
| 14 | EF_HAND_1; PATTERN           | PS00018          | EF-hand calcium-binding domain                               | D-[W]-[DNS]-[LIVFYW]-[DENSTG]-[DNQGHK]-[GP]-[LIVMC]-[DENQSTAGC]-x(2)         |
| 15 | ACTININ_1; PATTERN           | PS00019          | Actinin-type actin-binding domain signature 1                | [EQ]-[LIVY]-x-[ATV]-[FY]-[LDAM]-[T]-W-[PG]-N                                 |
| 16 | ACTININ_2; PATTERN           | PS00020          | Actinin-type actin-binding domain signature 2                | [LIVM]-x-[SGNL]-[LIVMN]-[DAGENRS]-[SAGPNVT]-x-[DNEAG]-[LIVM]-x-[DEAGQ]       |
| 17 | KRINGLE_1; PATTERN           | PS00021          | Kringle domain signature                                     | [FY]-C-[RH]-[NS]-x(7,8)-[IWI]-C                                              |
| 18 | EGF_1; PATTERN               | PS00022          | EGF-like domain signature 1                                  | C-x-C-x(2)-[V]-x(2)-G-[C]-x-C                                                |
| 19 | FN2_1; PATTERN               | PS00023          | Fibronectin type-II collagen-binding domain signature        | C-x(2)-P-F-x-[FYWIV]-x(7)-C-x(8,10)-W-C-x(4)-[DNSR]-[FYW]-x(3,5)-[FYW]-x-[F] |
| 20 | HEMOPEXIN; PATTERN           | PS00024          | Hemopexin domain signature                                   | [LIFAT]-[IL]-x(2)-W-x(2,3)-[PE]-x-[VF]-[LIVMFY]-[DENQS]-[STA]-[AV]-[LIVMFY]  |
| 21 | P_TREFOIL_1; PATTERN         | PS00025          | P-type Trefoil domain signature                              | [RRH]-x(2)-C-x-[FVPSTV]-x(3,4)-[ST]-x(3)-C-x(4)-C-C-[FYWH]                   |
| 22 | CHIT_BIND_1_1; PATTERN       | PS00026          | Chitin recognition or binding domain signature               | C-x(4,5)-C-C-S-x(2)-G-x-C-G-x(3,4)-[FYW]-C                                   |
| 23 | HOMEBOX_1; PATTERN           | PS00027          | 'Homeobox' domain signature                                  | [LIVMFYGG]-[ASLVR]-x(2)-[LIVMSTACN]-x-[LIVM]-[Y]-x(2)-[L]-[LIV]-[RKNQSTAIY]  |
| 24 | ZINC_FINGER_C2H2_1; PATTERN  | PS00028          | Zinc finger C2H2 type domain signature                       | C-x(2,4)-C-x(3)-[LIVMFYWC]-x(8)-H-x(3,5)-H                                   |
| 25 | LEUCINE_ZIPPER; PATTERN      | PS00029          | Leucine zipper pattern                                       | L-x(6)-L-x(6)-L-x(6)-L                                                       |
| 26 | NUCLEAR_REC_DBD_1; PATTERN   | PS00031          | Nuclear hormones receptors DNA-binding region signature      | C-x(2)-C-x(1,2)-[DENAVSPHKQT]-x(5,6)-[HNY]-[FY]-x(4)-C-x(2)-C-x(2)-F(2)-x-R  |
| 27 | ANTENNAPEIDIA; PATTERN       | PS00032          | 'Homeobox' antennapedia-type protein signature               | [LIVMFE]-[FY]-P-W-M-[RQTA]                                                   |
| 28 | ENGRAILED; PATTERN           | PS00033          | 'Homeobox' engrailed-type protein signature                  | L-M-A-[EQ]-G-L-Y-N                                                           |

**Fig. S8.** The UniProt flat file is converted to a table format. The table includes UniProt ID, name of organism, protein name, taxonomy, sequence, PROSITE pattern IDs, InterPro and Pfam IDs. The results are tabulated, and blank cells denotes absence of those IDs.

|    | Identification | Accession number | Description (recommended name)                         | Gene name | Organism species                        | Organelle | Length | MW     | PROSITE                 | InterPro             | Pfam             |
|----|----------------|------------------|--------------------------------------------------------|-----------|-----------------------------------------|-----------|--------|--------|-------------------------|----------------------|------------------|
| 21 | DHCR7_MIMIV    | QSUQ14           | Probable 7-dehydroc...                                 | MIMI_R807 | Acanthamoeba polyphaga mimivirus (APMV) |           | 447    | 51692  |                         | IPR001171;           | PF01222;         |
| 22 | DIPP_MIMIV     | QSUQW2           | Putative                                               | MIMI_L375 | Acanthamoeba polyphaga mimivirus (APMV) |           | 360    | 43662  | PS51462;PS50158;        | IPR000086;IPR0157... | PF00293;         |
| 23 | DNLI_MIMIV     | QSUP20           | DNA ligase                                             | MIMI_R303 | Acanthamoeba polyphaga mimivirus (APMV) |           | 636    | 72089  | PS50172;                | IPR001357;IPR0...    | PF00533;PF016... |
| 24 | DNMK_MIMIV     | QSUQ70           | Putative                                               | MIMI_R512 | Acanthamoeba polyphaga mimivirus (APMV) |           | 193    | 22106  |                         | IPR027417;           |                  |
| 25 | DPOLX_MIMIV    | Q7T6Y4           | Probable DNA polyme...                                 | MIMI_L318 | Acanthamoeba polyphaga mimivirus (APMV) |           | 354    | 40612  | PS00522;                | IPR002054;IPR0...    | PF14792;PF147... |
| 26 | DPOL_MIMIV     | QSUQR0           | DNA polymerase                                         | MIMI_R322 | Acanthamoeba polyphaga mimivirus (APMV) |           | 1740   | 201945 | PS50818;PS50819;        | IPR006172;IPR0061... | PF00136;PF03104  |
| 27 | DRTS_MIMIV     | QSUQG3           | Bifunctional dihydrofo...                              | MIMI_R497 | Acanthamoeba polyphaga mimivirus (APMV) |           | 563    | 65063  | PS51330;PS00091;        | IPR024072;IPR0...    | PF00186;PF00303  |
| 28 | END4_MIMIV     | QSUPY4           | Putative endonuclease 4                                | MIMI_R296 | Acanthamoeba polyphaga mimivirus (APMV) |           | 312    | 34857  | PS00730;PS51432;        | IPR001719;IPR0182... | PF01261;         |
| 29 | FPG_MIMIV      | QSUQ00           | Probable formamidop...                                 | MIMI_L315 | Acanthamoeba polyphaga mimivirus (APMV) |           | 287    | 33463  | PS51068;                | IPR015886;IPR0...    | PF01149;PF06831  |
| 30 | GFAT_MIMIV     | Q7T6X6           | Probable glutamine--fructose-6-phosphoaminotransferase | MIMI_L619 | Acanthamoeba polyphaga mimivirus (APMV) |           | 606    | 68570  | PS51278;PS51464;        | IPR017932;IPR0058... | PF01380;         |
| 31 | GLNA_MIMIV     | QSUR44           | Putative glutamine sy...                               | MIMI_R565 | Acanthamoeba polyphaga mimivirus (APMV) |           | 353    | 40079  | PS00180;PS00181;        | IPR008147;IPR0...    | PF00120;PF03951  |
| 32 | GLRX_MIMIV     | QSUQ14           | Probable glutaredoxin                                  | MIMI_R195 | Acanthamoeba polyphaga mimivirus (APMV) |           | 106    | 12084  | PS00195;PS51354;        | IPR011767;IPR0021... | PF00462;         |
| 33 | GNA1_MIMIV     | QSUP29           | Probable glucosamine...                                | MIMI_L316 | Acanthamoeba polyphaga mimivirus (APMV) |           | 148    | 17017  | PS51186;                | IPR016181;IPR0...    | PF00583;         |
| 34 | HSP70_MIMIV    | QSUQ49           | Heat shock 70 kDa protein homolog                      | MIMI_L393 | Acanthamoeba polyphaga mimivirus (APMV) |           | 634    | 70514  | PS00297;PS00329;PS01... | IPR018181;IPR0290... | PF00012;         |
| 35 | HSP7L_MIMIV    | QSUPU0           | Heat shock protein 7...                                | MIMI_L254 | Acanthamoeba polyphaga mimivirus (APMV) |           | 941    | 107204 | PS01036;                | IPR018181;IPR0...    | PF00012;         |
| 36 | IF4EH_MIMIV    | QSUQG4           | Eukaryotic translation initiation factor 4E homolog    | MIMI_L496 | Acanthamoeba polyphaga mimivirus (APMV) |           | 272    | 30949  |                         | IPR023398;IPR0010... | PF01652;         |
| 37 | KITH_MIMIV     | QSUP25           | Thymidine kinase                                       | MIMI_L258 | Acanthamoeba polyphaga mimivirus (APMV) |           | 225    | 25909  | PS00603;                | IPR027417;IPR0...    | PF00265;         |
| 38 | LONH_MIMIV     | QSUPT0           | Lon protease homolog                                   | MIMI_L251 | Acanthamoeba polyphaga mimivirus (APMV) |           | 1023   | 116827 |                         | IPR003593;IPR0039... | PF00004;PF05362  |
| 39 | MCAR_MIMIV     | QSUPV8           | Mitochondrial carrier-4...                             | MIMI_L276 | Acanthamoeba polyphaga mimivirus (APMV) |           | 237    | 27319  | PS50920;                | IPR018108;IPR0...    | PF00153;         |
| 40 | MCE_MIMIV      | QSUQX1           | Probable mRNA-capping enzyme                           | MIMI_R382 | Acanthamoeba polyphaga mimivirus (APMV) |           | 1170   | 136508 | PS51562;                | IPR023577;IPR0013... | PF01331;PF02940  |
| 41 | MGMT_MIMIV     | QSUINU9          | Probable methylated-...                                | MIMI_R693 | Acanthamoeba polyphaga mimivirus (APMV) |           | 149    | 16851  | PS00374;                | IPR001497;IPR0...    | PF01035;         |
| 42 | MUTSL_MIMIV    | QSUQU6           | Putative DNA mismatch repair protein mutS homolog L359 | MIMI_L359 | Acanthamoeba polyphaga mimivirus (APMV) |           | 1124   | 130330 | PS00486;                | IPR007695;IPR0004... | PF01624;PF05192  |

**Fig. S9.** Combining (mapping) both UniProt and PROSITE files results in a new table, which includes PROSITE ID, accession numbers of the protein containing the pattern, description of the pattern and the pattern consensus. The results are tabulated, and blank cells denotes absence of consensus pattern in PROSITE flat file.

|    | PROSITE | Accession numbers | Description                                                     | Pattern                                                                             |
|----|---------|-------------------|-----------------------------------------------------------------|-------------------------------------------------------------------------------------|
| 1  | PS51278 | QSUQE1;Q7T6X6;    | Glutamine amidotransferase type 2 domain profile                |                                                                                     |
| 2  | PS00122 | QSUR02;           | Carboxylesterases type-B serine active site                     | F[GR]Gx(4)[LIVM]x[LIV]xGxS[STAG]G                                                   |
| 3  | PS00941 | QSUR02;           | Carboxylesterases type-B signature 2                            | [EDA][D]G[CL][YTF][LIVT][DNS][LIV][LIVFYW]x[PQR]                                    |
| 4  | PS00086 | QSUQI3;           | Cytochrome P450 cysteine heme-iron ligand signature             | [FW][SGNH]x[GD][F][RKH#T][P]C[LIVMFAP][GAD]                                         |
| 5  | PS00191 | QSUR80;           | Cytochrome b5 family, heme-binding domain signature             | [FY][LIVMK]{}{}[Q]HP[GAA]G                                                          |
| 6  | PS50255 | QSUR80;           | Cytochrome b5 family, heme-binding domain profile               |                                                                                     |
| 7  | PS51462 | QSUQW2;           | Nudix hydrolase domain profile                                  |                                                                                     |
| 8  | PS50158 | QSUQW2;           | Zinc finger CCHC-type profile                                   |                                                                                     |
| 9  | PS50172 | QSUP20;           | BRCT domain profile                                             |                                                                                     |
| 10 | PS00522 | Q7T6Y4;           | DNA polymerase family X signature                               | G[SG][LFY]xR[GE]x(3)[SGCL]x[D][LIVM]D[LIVMFY](3)x(2)[SAP]                           |
| 11 | PS50818 | QSUQR0;           | Intein C-terminal splicing motif profile                        |                                                                                     |
| 12 | PS50819 | QSUQR0;           | Intein DOD-type homing endonuclease domain profile              |                                                                                     |
| 13 | PS51330 | QSUQG3;           | Dihydrofolate reductase (DHFR) domain profile                   |                                                                                     |
| 14 | PS00091 | QSUQG3;           | Thymidylate synthase active site                                | Rx(2)[LIVMT]x(2,3)[FWY][QNYDI]x(8,13)[LVESI]xPC[HAVMLC]x(3)[QMTLHD][FYWL]x(0,1)[LV] |
| 15 | PS00730 | QSUPY4;           | AP endonucleases family 2 signature 2                           | [GSARY][LIVMF][CT][LIVMFY]DTCH                                                      |
| 16 | PS51432 | QSUPY4;           | AP endonucleases family 2 profile                               |                                                                                     |
| 17 | PS51068 | QSUQ00;           | Formamidopyrimidine-DNA glycosylase catalytic domain profile    |                                                                                     |
| 18 | PS51464 | Q7T6X6;           | SIS domain profile                                              |                                                                                     |
| 19 | PS00180 | QSUR44;           | Glutamine synthetase signature 1                                | [FYWL]DGSSx(6,8)[DENQSTAK][SA][DE]x(2)[LIVMFY]                                      |
| 20 | PS00181 | QSUR44;           | Glutamine synthetase putative ATP-binding region signature      | KP[LIVMFYA]x(3,5)[NPAT][GA][GSTAN][GA]xHx(3)S                                       |
| 21 | PS00195 | QSUQ14;           | Glutaredoxin active site                                        | [LIVMD][FYSA]x(4)C[PV][FYWF]Cx(2)[TAV]x(2,3)[LV]                                    |
| 22 | PS51354 | QSUQ14;           | Glutaredoxin domain profile                                     |                                                                                     |
| 23 | PS51186 | QSUP29;QSUR52;    | Gcn5-related N-acetyltransferase (GNAT) domain profile          |                                                                                     |
| 24 | PS00297 | QSUQ49;           | Heat shock hsp70 proteins family signature 1                    | [IV]DLGT[ST]x[SC]                                                                   |
| 25 | PS00329 | QSUQ49;           | Heat shock hsp70 proteins family signature 2                    | [LIVMF][LIVMFY][DN][LIVMF]G[GS][AST]x(3)[ST][LIVM][LIVMFC]                          |
| 26 | PS01036 | QSUQ49;QSUPU0;    | Heat shock hsp70 proteins family signature 3                    | [LIVMY]x[LIVMF]xGGx[ST](L,S)[LIVM]Px[LIVM]x[DEQKRSTA]                               |
| 27 | PS00603 | QSUP25;           | Thymidine kinase cellular-type signature                        | [GA]x(1,2)[DE]Yx[STAPV]xC[NKR]x[CH][LIVMFYWH]                                       |
| 28 | PS50920 | QSUPV8;           | Solute carrier (Solcar) repeat profile                          |                                                                                     |
| 29 | PS51557 | QSUQY1;           | RNA (guanine-N7)-methyltransferase (EC 2.1.1.55) domain profile |                                                                                     |
